# Supplementary material for: Ankle pain after total knee arthroplasty: a study of lower extremity imaging parameters
Source: Research Square preprint supplement (doi:10.21203/rs.3.rs-5654896/v1), 2024-12-24
Supplement: Supplementary file 1 [file 7c21dbbf33c62879dadc435a.xlsx]

## Sheet: Sheet1
	姓名	住院号	1：Female2：Male	Left/Right knee		Postoperative ankle pain	HKA	（Tilt angle of ankle，TAA）	（talar tilt angle，TTA）	TI	(mLDTA)	HAVA	ADTA
1	代炳香	6890150	Female 62（years）	Left	Preoperatively	No	-9.9	4.8	0.7	5.5	85	7	85
	术后3个月				postoperatively		-4.3	-3.7	0.3	4	82.6	2	80.8
2	刘云祥		Male 66（years）	Left	Preoperatively	No	-11.1	1.2	0.6	0.6	82.9	17	79
	术后3月				postoperatively		-4	-1.3	1.7	-3	83.3	-5.6	78.6
4	耿淑英		Female 79（years）	Right	Preoperatively	No	-12.1	10.7	0.4	11.1	88.3	1.3	85
	术后三个月				postoperatively		-5.5	-1.6	-0.4	-2	83.3	-0.5	85
5			Female 79（years）	Left	Preoperatively	No	-14.6	12.2	0.7	11.5	89.5	4.9
					postoperatively		-5	8.5	-0.3	8.2	90.4	2
5	侯丕兰		Female 75（years）	Left	Preoperatively	No	-8	6.3	0.8	7	90.7	5.1	83.9
	术后3个月				postoperatively		-0.4	5.2	0.3	5.5	90.5	3.1	84
6			Female 75（years）	Right	Preoperatively	No	-12.3	8.9	0	8.9	90	5
					postoperatively		-2.4	4.2	0.5	3.7	89.2	2
7	王明义		Male 66（years）	Left	Preoperatively	Yes	-15.5	8.3	0.8	7.5	89.6	2.5	80.5
	术后三个月				postoperatively		-7	-0.1	2.9	2.8	91	-0.5	80
8	赵振芳		Female 57（years）	Right	Preoperatively	No	-15.6	11.7	-2.9	14.6	91	-2.5	83
	术后三个月				postoperatively		-1	4	-2.2	6.2	91.7	-3	80
9	赵振芳		Female 57（years）	Left	Preoperatively	Yes	-14	7.8	1	6.8	91.5	3.5	86
	术后三个月				postoperatively		-3	7	-4.5	11.5	92.4	1	89
10	孙封来		Male 61（years）	Right	Preoperatively	No	-9	4	1	3	86.8	3	82
	术后三个月				postoperatively		-3.3	-6	2	-8	80	-0.5	81
11	孙封来		Male 61（years）	Left	Preoperatively	No	-9	7.1	-0.8	7.9	87.6	3	86
					postoperatively		-1	-12.3	1.3	-13.6	80.4	-1	88
12	马国英		Female 66（years）	Right	Preoperatively	No	-8.5	6.5	-2	8.5	84.6	5.7	77.3
	术后3个月				postoperatively		-3.4	6	-1	7	82.2	5	76.8
13	马国英		Female 66（years）	Left	Preoperatively	No	-14.7	-3.2	-1.5	-1.7	79.5	-1.7	87
					postoperatively		-0.7	-5.8	-1.7	-4.1	81.7	-2.5	86
10	庞祥焕		Female 65（years）	Left	Preoperatively	Yes	-13.6	6.2	-2.3	8.5	82	8.8	79
	术后3个月				postoperatively		-0.8	3.2	0.5	2.7	87.6	-2.5	80
	庞祥焕		Female 65（years）	Right	Preoperatively	No	-12	3	-2	5	82.5	5	79
					postoperatively		-1.5	-4.5	-0.3	-4.1	83	1.2	80
11	吴洪信		Male 59（years）	Right	Preoperatively	No	-10.9	5.8	0.5	5.3	83.6	4.5	83.2
	术后3个月				postoperatively		-4	-5.7	3	-8.7	76.6	-7.7	82.5
12	陈化杰		Male 55（years）	Right	Preoperatively	No	-4.5	-0.6	0	-0.6	87.5	13.1	81.7
	术后3个月				postoperatively		-3.2	-8.2	-0.8	-9	79.5	14.6	77
13	杨建花		Female 60（years）	Left	Preoperatively	Yes	-15.6	17.5	0.6	16.9	90	-6.5	76
	术后3个月				postoperatively		-4.8	9.5	0	9.5	96.7	-5.1	76.3
15	秦成荣		Female 57（years）	Right	Preoperatively	Yes	-13	11.7	-1.5	13.2	90	7.5	86.1
	术后3个月				postoperatively		-1.1	4.5	-1.5	6	92	-0.8	85.6
16	王桂兰		Female 67（years）	Right	Preoperatively	No	-6	5	-0.7	5.7	89.6	7.8	82
	术后3个月				postoperatively		-4.5	1.7	-1.2	0.4	87	17.8	80
17	王庆生		Male 66（years）	Left	Preoperatively	No	-6.6	7	0	7	90	5.1	79
	术后3个月				postoperatively		-1.6	1.7	0.5	1.2	89.5	6.9	80.7
18	杨体顺		Male 85（years）	Left	Preoperatively	No	-10	7.1	-1.5	8.5	81.4	7.4	81
	术后3个月				postoperatively		-5.7	1.6	-2.1	3.6	79.7	3.3	82
19	亓萍		Female 69（years）	Left	Preoperatively	No	-7.9	11.3	1	10.3	93.5	5.7	77.5
	术后3个月				postoperatively		3.5	2.5	1.1	1.4	93.3	-10.3	80
20	邓秀婷		Female 78（years）	Right	Preoperatively	Yes	-13.4	7	-3	10	91.5	-1.3	80.6
	术后3个月				postoperatively		-3.4	8	0.5	7.5	92	-10.3	81.3
21	房克风		Female 71（years）	Right膝	Preoperatively	Yes	-24.8	8.3	-2.1	10.4	84.1	11.5	80
	术后3个月				postoperatively		-10	2.6	0	2.6	87	0	78
22	岳宏明		Male 86（years）	Right膝	Preoperatively	No	-10.6	9.5	4	5.5	92.3	10	76.1
	术后3个月				postoperatively		-5	-3.8	1.4	-5.2	79.6	-4.5	79
23	尚玉华		Female 55（years）	Right膝	Preoperatively	Yes	-20	8.7	-2.3	11	83.3	13.8	78.1
	术后3个月				postoperatively		-4.2	7	-0.5	7.5	86.1	2	78
24	李善德		Male 59（years）	Left膝	Preoperatively	No	-5.2	10.9	0	10.9	95.8	5.8	79.6
	术后3个月				postoperatively		-2	4.6	0.5	4.1	90.4	2.8	78
25	于书琴		Female 66（years）	Right膝	Preoperatively	No	-7.4	11.4	0	11.4	92.5	4	79.6
	术后3个月				postoperatively		-0.7	2.6	1.6	1	91.4	-1	77.9
26	康存利		Male 65（years）	Right	Preoperatively	No	-4.6	7.2	-2.3	9.5	90.4	-1.5	84.2
	术后3个月				postoperatively		-6.9	9.7	-0.5	10.2	83.5	0	84.3
28	杜秀平	术前	Female 71（years）	Left膝	Preoperatively	Yes	-13.6	10.2	-7.1	17.3	88.2	-1.1	78.3
		术后三个月			postoperatively		-0.8	5.7	-12.8	18.5	91	-4.3	89.6
29	闫桂菊	术前	Female 54（years）	Left膝	Preoperatively	Yes	-17.2	12.4	-4.1	16.5	91.4	3.1	79
		术后三个月			postoperatively		-1.8	-1.1	-5.1	4	92.3	-1.6	78.3
30	袁素龄	术前	Female 61（years）	Right膝	Preoperatively	No	-13.9	10.3	-2	12.3	90.9	-1.2	79.8
		术后三个月			postoperatively		-2.3	2.3	-2.2	4.5	90	-6.8	80.6
31	沙品兰	术前	Female 70（years）	Left膝	Preoperatively	No	-18.5	7.6	1.6	6	88	10.6	84.6
		术后三个月			postoperatively		-13.2	1.8	0.5	1.3	84.6	4.6	80.1
32	梁瑞卿	术前	Female 81（years）	Right膝	Preoperatively	No	-14.4	9	0.8	8.2	87.5	-3	81.6
		术后三个月			postoperatively		-4.2	-8.4	1.9	-10.3	78	-16.8	80.4
33	肖兆磊	术前	Male66（years）	Left膝	Preoperatively	No	-9.5	5.2	-1	6.2	86.7	2.5	82.3
		术后三个月			postoperatively		-3.3	-2.2	0	-2.2	83.7	-5.3	81.9
34	张风香	术前	Female 62（years）	Left膝	Preoperatively	Yes	-17.2	15.2	-2.2	17.5	89.3	1.4	78.2
		术后三个月			postoperatively		-6.9	1.5	2	3.5	90	3.1	75.9
35	展爱芸	术前	Female 64（years）	Right膝	Preoperatively	Yes	15.3	-18	0.5	-18.5	80.6	-5	82.3
		术后三个月			postoperatively		1.1	-12.5	0	-12.5	73.4	-12	80
37	邵桂泽	术前	Male 76（years）	Left膝	Preoperatively	Yes	-23	12	0	12	90	11.3	76.1
		术后三个月			postoperatively		-7.3	3.2	-0.3	3.5	90.4	5	76.3
38	王有芳	术前	Female 53（years）	Left膝	Preoperatively	No	-12.4	1.3	-1.3	2.6	82.4	-0.5	77.8
		术后三个月			postoperatively		-2.5	-8	0	-8	79.5	-2.4	77
40	商运江	术前	Male 60（years）	Left膝	Preoperatively	No	-12.2	1.5	-1.8	3.3	83	8	82
		术后三个月			postoperatively		-9.5	-2.3	0.3	-2	80.7	5.4	80.8
